# Supplementary material
Source: Springer Nature journal article supplement (https://www.springermedizin.de/resource/supplementary/12939_2013_438_MOESM1_ESM.pdf/9551172)

## **Social determinants**

---

### **Socioeconomic position**

- \* Education
- \* Income
- \* Occupation
- \* Employment

### **Place**

- \* Neighborhood
- \* Urban vs. rural

## **Mediating/ moderating conditions**

---

### **Sociodemogra phics**

- \* Age
- \* Gender
- \* Race/ethnicity

### **Social Networks**

- \* Social capital
- \* Resources

## **Health communication outcomes**

---

- \* Health media use  
and exposure
- \* Information seeking
- \* Attention
- \* Information  
processing

## **Health outcomes**

---

- \* Knowledge
- \* Health beliefs
- \* Comprehension
- \* Capacity for  
action
- \* Incidence
- \* Health behaviors
- \* Prevention
- \* Screening
- \* Treatment
- \* Survivorship
- \* End-of-life care

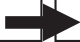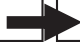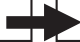

Supplement: MOESM1 [file 9551172]
